# Supplementary material for: Discovery of APL-1030, a Novel, High-Affinity Nanofitin Inhibitor of C3-Mediated Complement Activation
Source: MDPI journal article supplement (doi:10.3390/biom12030432), 2022-03-11
Supplement: s1 [file s1]

## **Supplemental Information: Methods**

### **Isothermal Titration Calorimetry**

C3 and C3b (Complement Technology, Inc.) were dialyzed overnight against 1.5 L of 10 mM sodium phosphate pH 7.4 and 150 mM sodium chloride using Slide-A-Lyzer G2 cartridges (1 kDa molecular weight cutoff for C3 and 3.5 kDa molecular weight cutoff for C3b; Thermo Fisher Scientific). Following concentration, final C3 and C3b samples were diluted to 10  $\mu$ M before use. APL-1030 (iBET) was diluted to 75  $\mu$ M.

A known amount of C3 or C3b was placed in the sample cell of the isothermal titration calorimetry instrument (Malvern MicroCal ITC200 [Malvern Instruments]). In total, 21 injections of APL-1030 (1.85  $\mu$ L each) were performed until the final molar ratio was 1.55 to 1 (12.8  $\mu$ M APL-1030 to 8.3  $\mu$ M protein). During the experiment, the sample cell and a reference cell were maintained at 25 °C. The amount of power required to maintain that temperature was measured after each injection to quantify the heat generated upon binding. From this, the binding enthalpy ( $\Delta H$ ), binding stoichiometry (N), dissociation constant ( $K_D$ ), entropy ( $\Delta S$ ), and free energy ( $\Delta G$ ) were calculated.
